# Supplementary material for: Interhemispheric bias in earth's climate response to orbital forcing
Source: Copernicus journal article supplement (doi:10.5194/cp-2015-156), 2016-01-15
Supplement: Supplementary file [file cp-2015-156-AC1-supplement.pdf]

1) To calculate the bias in Northern Hemisphere:  
(i.e. effect of SH land distribution on NH climate response)

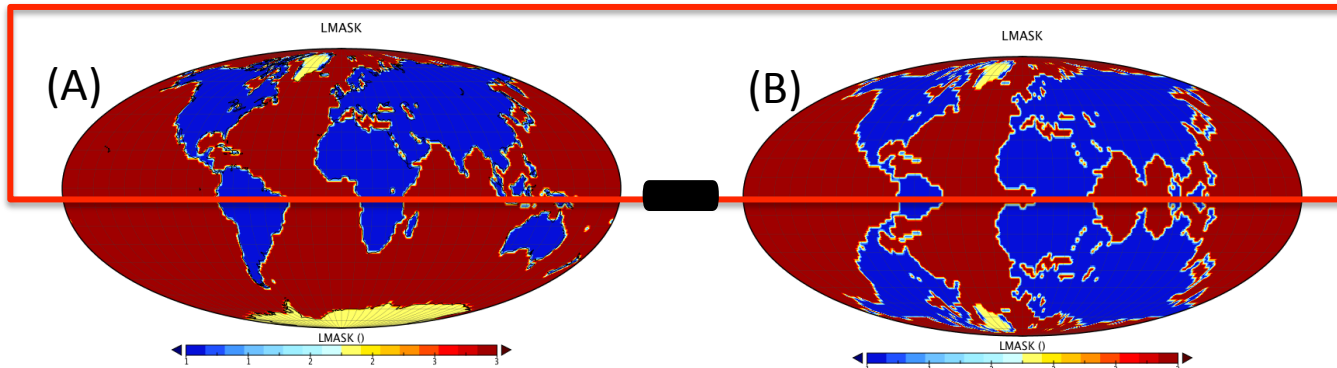

Northern Hemisphere  
(Hemisphere being considered) is constant

- Two experiments are run: (A) Real world (B) North-symmetric world
- Climate response in the Northern Hemisphere in (A) and (B) are different.
- This difference in climate response (bias) is caused due to the different land distribution in the Southern Hemisphere in experiments (A) and (B).
- Thus,  $LHB_{NORTH-HEMISPHERE} = \text{climate response of NH in (A)} - \text{climate response of NH in (B)}$

2) Now, if we try using South-symmetric world to calculate the bias in NH:

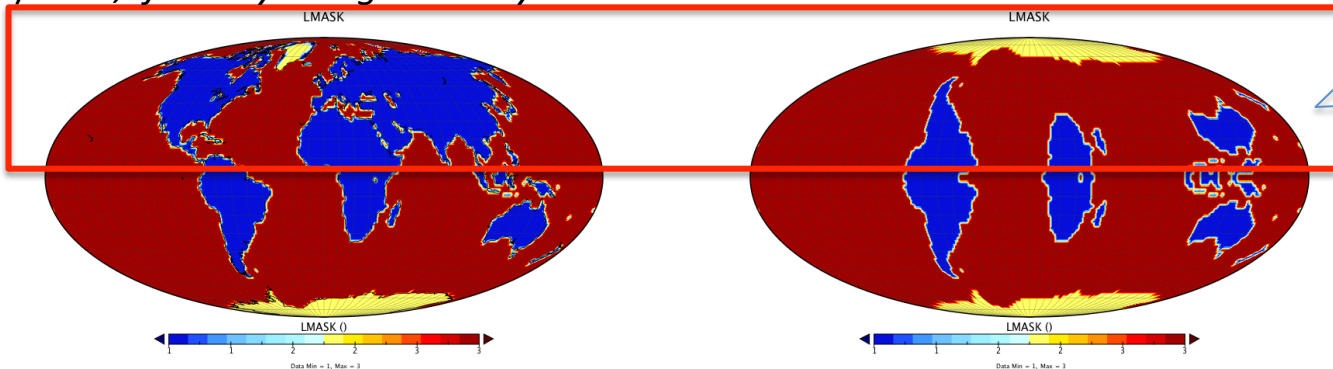

NH is different!  
Hence cannot be used to calculate the  $LHB_{NORTH-HEMISPHERE}$

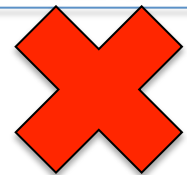

From the above, it should be clear why we cannot use South-symmetric model to calculate the bias for Northern Hemisphere.

2) To calculate the bias in Southern Hemisphere:  
 (i.e. effect of NH land distribution on SH climate response)

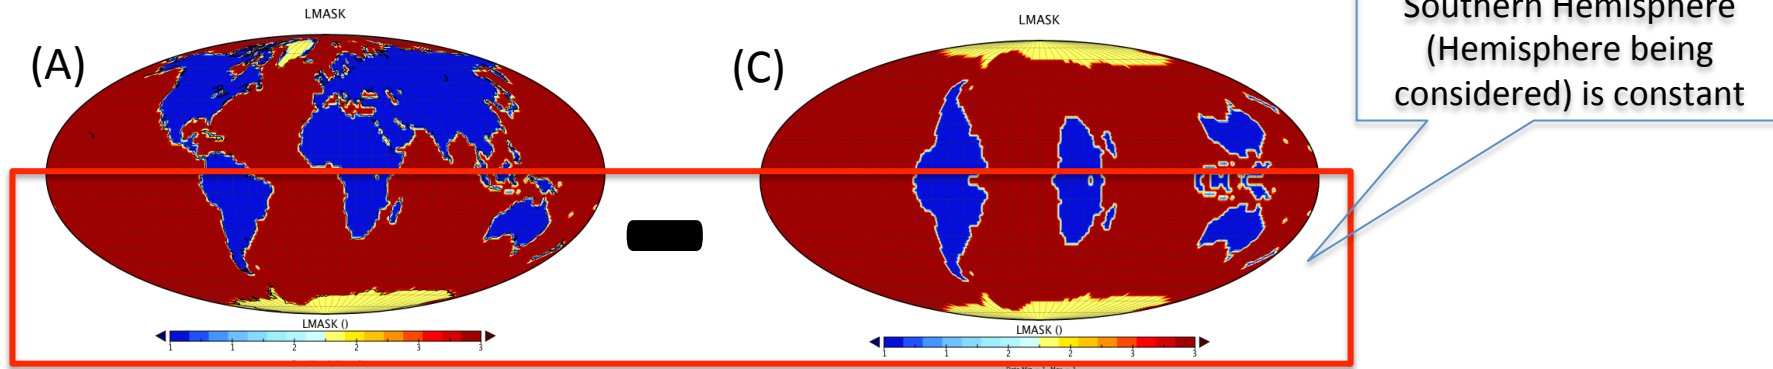

- Two experiments are run: (A) Real world (C) South-symmetric world
- Climate response in the Southern Hemisphere in (A) and (C) are different.
- This difference in climate response (bias) is caused due to the different land distribution in the Northern Hemisphere in experiments (A) and (C).
- Thus,  $LHB_{\text{SOUTH-HEMISPHERE}} = \text{climate response of SH in (A)} - \text{climate response of SH in (C)}$

2) Now, if we try using North-symmetric world to calculate the bias in SH:

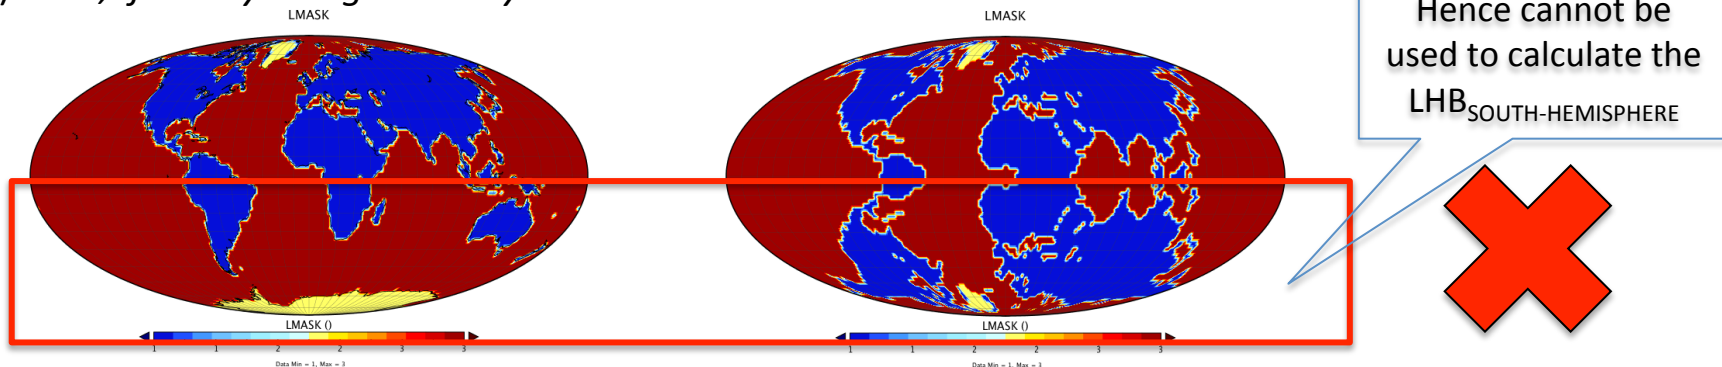

From the above, it should be clear why we cannot use North-symmetric model to calculate the bias for Southern Hemisphere.
